# Supplementary material for: Group A Streptococcus M1T1 Intracellular Infection of Primary Tonsil Epithelial Cells Dampens Levels of Secreted IL-8 Through the Action of SpyCEP
Source: PubMed Central journal article supplement (PMC5966554; doi:10.3389/fcimb.2018.00160), 2018-05-17
Supplement: Table_1.pdf [file Table_1.pdf]

**Table S1. Metadata for transcriptome interaction network and pathway analysis of 5448 intracellularly infected TEpi cells in comparison to mock TEpi cells.**

| Gene symbol | Full name                                        | Log2FC gene expression in comparison to Mock cells | Adjusted P-value | Protein-protein interaction data type from Stringdb.com               | Upregulated pathways from Innatedb.com                                                                                                                                                                                                                                                                                                                                                                                                                                                                                                                                                                                                                                       |
|-------------|--------------------------------------------------|----------------------------------------------------|------------------|-----------------------------------------------------------------------|------------------------------------------------------------------------------------------------------------------------------------------------------------------------------------------------------------------------------------------------------------------------------------------------------------------------------------------------------------------------------------------------------------------------------------------------------------------------------------------------------------------------------------------------------------------------------------------------------------------------------------------------------------------------------|
| FOSB        | FBJ murine osteosarcoma viral oncogene homolog B | 5.412                                              | 7.89E-06         | experimentally determined, textmining                                 | AP-1 transcription factor network, Osteoclast differentiation                                                                                                                                                                                                                                                                                                                                                                                                                                                                                                                                                                                                                |
| TNF         | tumor necrosis factor                            | 5.228                                              | 7.66E-06         | coexpression, textmining                                              | Calcineurin-regulated NFAT-dependent transcription in lymphocytes, Cytokine-cytokine receptor interaction, Osteoclast differentiation, GPCR signaling, IL23-mediated signaling events, MAPK signaling pathway, Signal transduction through il1r, NOD-like receptor signaling pathway, TWEAK, amb2 Integrin signaling, Downstream signaling in naïve CD8+ T cells, Toll-like receptor signaling pathway, Hematopoietic cell lineage, Hepatitis C, Keratinocyte differentiation, Leishmaniasis, HIV-1 Nef: Negative effector of Fas and TNF-alpha, T cell receptor signaling pathway, TNFR1 signaling pathway, TNF receptor signaling pathway                                  |
| CXCL2       | chemokine (C-X-C motif) ligand 2                 | 4.717                                              | 3.18E-05         | coexpression, curated databases, protein homology, textmining         | Cytokine-cytokine receptor interaction, GPCR ligand binding, Class A/1 (Rhodopsin-like receptors), NOD-like receptor signaling pathway, Chemokine receptors bind chemokines, Signaling by GPCR, Peptide ligand-binding receptors, GPCR downstream signaling, G alpha (i) signalling events                                                                                                                                                                                                                                                                                                                                                                                   |
| IL8         | interleukin 8                                    | 4.657                                              | 2.17E-05         | coexpression, curated databases, protein homology, textmining         | AP-1 transcription factor network, ATF-2 transcription factor network, Calcineurin-regulated NFAT-dependent transcription in lymphocytes, Cytokine-cytokine receptor interaction, Validated transcriptional targets of AP1 family members Fra1 and Fra2, GPCR signaling, GPCR ligand binding, Class A/1 (Rhodopsin-like receptors), NOD-like receptor signaling pathway, Chemokine receptors bind chemokines, Glucocorticoid receptor regulatory network, Signaling by GPCR, Toll-like receptor signaling pathway, Senescence-Associated Secretory Phenotype (SASP), Peptide ligand-binding receptors, Hepatitis C, GPCR downstream signaling, G alpha (i) signalling events |
| ATF3        | activating transcription factor 3                | 4.384                                              | 7.98E-05         | experimentally determined, coexpression, protein homology, textmining | AP-1 transcription factor network, ATF-2 transcription factor network, Direct p53 effectors                                                                                                                                                                                                                                                                                                                                                                                                                                                                                                                                                                                  |
| EGR2        | early growth response 2                          | 4.337                                              | 1.07E-05         | experimentally determined, coexpression, textmining                   | Calcineurin-regulated NFAT-dependent transcription in lymphocytes                                                                                                                                                                                                                                                                                                                                                                                                                                                                                                                                                                                                            |

|          |                                                |       |          |                                                                        |                                                                                                                                                                                                                                                                                  |
|----------|------------------------------------------------|-------|----------|------------------------------------------------------------------------|----------------------------------------------------------------------------------------------------------------------------------------------------------------------------------------------------------------------------------------------------------------------------------|
| PPP1R15A | protein phosphatase 1, regulatory subunit 15A  | 4.057 | 6.32E-07 | coexpression, textmining                                               | None                                                                                                                                                                                                                                                                             |
| EGR4     | early growth response 4                        | 3.975 | 1.33E-04 | experimentally determined, textmining                                  | Calcineurin-regulated NFAT-dependent transcription in lymphocytes, Downstream signaling in naïve CD8+ T cells                                                                                                                                                                    |
| TNFAIP3  | tumor necrosis factor, alpha-induced protein 3 | 3.969 | 9.07E-06 | experimentally determined, coexpression, textmining                    | CD40/CD40L signaling, NOD-like receptor signaling pathway, Tnfr2 signaling pathway, RIG-I/MDA5 mediated induction of IFN-alpha/beta pathways, TNF receptor signaling pathway                                                                                                     |
| TRAF1    | TNF receptor-associated factor 1               | 3.928 | 6.14E-05 | experimentally determined, curated databases, coexpression, textmining | CD40/CD40L signaling, TWEAK, Tnfr2 signaling pathway, RANKL, Keratinocyte differentiation, HIV-1 Nef: Negative effector of Fas and TNF-alpha, TNF receptor signaling pathway                                                                                                     |
| CCL20    | chemokine (C-C motif) ligand 20                | 3.897 | 2.41E-05 | coexpression, curated databases, textmining                            | Cytokine-cytokine receptor interaction, GPCR ligand binding, Class A/1 (Rhodopsin-like receptors), NOD-like receptor signaling pathway, Chemokine receptors bind chemokines, Signaling by GPCR, Peptide ligand-binding receptors, GPCR downstream signaling, G                   |
| LIF      | leukemia inhibitory factor                     | 3.869 | 1.34E-04 | curated databases, textmining                                          | Cytokine-cytokine receptor interaction, Validated transcriptional targets of API family members Fra1 and Fra2, GPCR signaling, Direct p53 effectors, Jak-STAT signaling pathway                                                                                                  |
| HBEGF    | heparin-binding EGF-like growth factor         | 3.869 | 4.81E-06 | curated databases, textmining                                          | GPCR signaling, Signaling by GPCR, ErbB receptor signaling network                                                                                                                                                                                                               |
| IRF1     | interferon regulatory factor 1                 | 3.811 | 7.98E-05 | experimentally determined, coexpression, curated databases, textmining | Glucocorticoid receptor regulatory network, Cytokine Signaling in Immune system, IL6-mediated signaling events, Interferon alpha/beta signaling, Hepatitis C, RIG-I/MDA5 mediated induction of IFN-alpha/beta pathways                                                           |
| EGR1     | early growth response 1                        | 3.811 | 1.23E-03 | experimentally determined, coexpression, curated databases, textmining | AP-1 transcription factor network, Calcineurin-regulated NFAT-dependent transcription in lymphocytes, Glucocorticoid receptor regulatory network, Cytokine Signaling in Immune system, Downstream signaling in naïve CD8+ T cells, Interferon alpha/beta signaling, Oncostatin_M |

|       |                                                                                       |       |          |                                                                        |                                                                                                                                                                                                                                                                                                                                                                                                                                                                                                                                                                                                                                                                                                                                                                                                                                                                                                                                                                                                                                                                                                                                                                                                                                                                                                                                                         |
|-------|---------------------------------------------------------------------------------------|-------|----------|------------------------------------------------------------------------|---------------------------------------------------------------------------------------------------------------------------------------------------------------------------------------------------------------------------------------------------------------------------------------------------------------------------------------------------------------------------------------------------------------------------------------------------------------------------------------------------------------------------------------------------------------------------------------------------------------------------------------------------------------------------------------------------------------------------------------------------------------------------------------------------------------------------------------------------------------------------------------------------------------------------------------------------------------------------------------------------------------------------------------------------------------------------------------------------------------------------------------------------------------------------------------------------------------------------------------------------------------------------------------------------------------------------------------------------------|
| IL6   | interleukin 6 (interferon, beta 2)                                                    | 3.739 | 5.25E-04 | coexpression, curated databases, textmining                            | AP-1 transcription factor network, ATF-2 transcription factor network, Cytokine-cytokine receptor interaction, Validated transcriptional targets of API family members Fra1 and Fra2, GPCR signaling, IL23-mediated signaling events, Signal transduction through il1r, NOD-like receptor signaling pathway, Activated TLR4 signalling, Toll Like Receptor 4 (TLR4) Cascade, Toll-Like Receptors Cascades, Jak-STAT signaling pathway, MyD88 dependent cascade initiated on endosome, Toll Like Receptor 7/8 (TLR7/8) Cascade, Glucocorticoid receptor regulatory network, Cytokine Signaling in Immune system, Signaling by GPCR, amb2 Integrin signaling, Signaling by Interleukins, Toll Like Receptor 9 (TLR9) Cascade, MyD88:Mal cascade initiated on plasma membrane, Toll Like Receptor 2 (TLR2) Cascade, Toll Like Receptor TLR1:TLR2 Cascade, Toll Like Receptor TLR6:TLR2 Cascade, IL6-mediated signaling events, Toll-like receptor signaling pathway, MyD88 cascade initiated on plasma membrane, TRAF6 mediated induction of NFkB and MAP kinases upon TLR7/8 or 9 activation, Toll Like Receptor 10 (TLR10) Cascade, Toll Like Receptor 5 (TLR5) Cascade, Hematopoietic cell lineage, MyD88-independent cascade, TRIF-mediated TLR3/TLR4 signaling, Toll Like Receptor 3 (TLR3) Cascade, Senescence-Associated Secretory Phenotype (SASP) |
| BIRC3 | baculoviral IAP repeat containing 3                                                   | 3.688 | 3.20E-05 | experimentally determined, coexpression, curated databases, textmining | CD40/CD40L signaling, NOD-like receptor signaling pathway, Activated TLR4 signalling, Toll Like Receptor 4 (TLR4) Cascade, Toll-Like Receptors Cascades, MyD88-independent cascade, TRIF-mediated TLR3/TLR4 signaling, Toll Like Receptor 3 (TLR3) Cascade, Keratinocyte differentiation, HIV-1 Nef: Negative effector of Fas and TNF-alpha, TNF receptor signaling pathway                                                                                                                                                                                                                                                                                                                                                                                                                                                                                                                                                                                                                                                                                                                                                                                                                                                                                                                                                                             |
| NR4A1 | nuclear receptor subfamily 4, group A, member 1                                       | 3.674 | 1.58E-04 | experimentally determined, coexpression, textmining                    | MAPK signaling pathway, Glucocorticoid receptor regulatory network                                                                                                                                                                                                                                                                                                                                                                                                                                                                                                                                                                                                                                                                                                                                                                                                                                                                                                                                                                                                                                                                                                                                                                                                                                                                                      |
| CD83  | CD83 molecule                                                                         | 3.665 | 6.14E-05 | coexpression, textmining                                               | None                                                                                                                                                                                                                                                                                                                                                                                                                                                                                                                                                                                                                                                                                                                                                                                                                                                                                                                                                                                                                                                                                                                                                                                                                                                                                                                                                    |
| MAFF  | v-maf musculoaponeurotic fibrosarcoma oncogene homolog F (avian)                      | 3.605 | 9.07E-06 | experimentally determined, coexpression, textmining                    | Oxidative stress induced gene expression via nrf2                                                                                                                                                                                                                                                                                                                                                                                                                                                                                                                                                                                                                                                                                                                                                                                                                                                                                                                                                                                                                                                                                                                                                                                                                                                                                                       |
| PTGS2 | prostaglandin-endoperoxide synthase 2 (prostaglandin G/H synthase and cyclooxygenase) | 3.471 | 4.77E-04 | coexpression, textmining                                               | Calcineurin-regulated NFAT-dependent transcription in lymphocytes, Calcium signaling in the CD4+ TCR pathway, Leishmaniasis                                                                                                                                                                                                                                                                                                                                                                                                                                                                                                                                                                                                                                                                                                                                                                                                                                                                                                                                                                                                                                                                                                                                                                                                                             |

|         |                                                                                       |       |          |                                                                                          |                                                                                                                                                                                                                                                                                                                                                                                                                                                              |
|---------|---------------------------------------------------------------------------------------|-------|----------|------------------------------------------------------------------------------------------|--------------------------------------------------------------------------------------------------------------------------------------------------------------------------------------------------------------------------------------------------------------------------------------------------------------------------------------------------------------------------------------------------------------------------------------------------------------|
| NR4A3   | nuclear receptor subfamily 4, group A, member 3                                       | 3.401 | 5.08E-04 | experimentally determined, textmining                                                    | None                                                                                                                                                                                                                                                                                                                                                                                                                                                         |
| EGR3    | early growth response 3                                                               | 3.281 | 9.07E-06 | experimentally determined, coexpression, textmining                                      | Calcineurin-regulated NFAT-dependent transcription in lymphocytes                                                                                                                                                                                                                                                                                                                                                                                            |
| GADD45B | growth arrest and DNA-damage-inducible, beta                                          | 3.279 | 1.76E-05 | experimentally determined, protein homology, textmining                                  | MAPK signaling pathway, IL12-mediated signaling events                                                                                                                                                                                                                                                                                                                                                                                                       |
| SOCS3   | suppressor of cytokine signaling 3                                                    | 3.276 | 9.07E-06 | coexpression, curated databases, textmining                                              | ATF-2 transcription factor network, Osteoclast differentiation, IL23-mediated signaling events, Jak-STAT signaling pathway, Cytokine Signaling in Immune system, Signaling by Interleukins, IL6-mediated signaling events, Interferon alpha/beta signaling, Hepatitis C, Oncostatin_M                                                                                                                                                                        |
| DUSP5   | dual specificity phosphatase 5                                                        | 3.143 | 1.46E-05 | experimentally determined, coexpression, textmining                                      | ATF-2 transcription factor network, MAPK signaling pathway, Direct p53 effectors                                                                                                                                                                                                                                                                                                                                                                             |
| CSF2    | colony stimulating factor 2 (granulocyte-macrophage)                                  | 2.968 | 6.10E-04 | coexpression, textmining                                                                 | AP-1 transcription factor network, Calcineurin-regulated NFAT-dependent transcription in lymphocytes, Cytokine-cytokine receptor interaction, GPCR signaling, Calcium signaling in the CD4+ TCR pathway, Jak-STAT signaling pathway, Glucocorticoid receptor regulatory network, Cytokine Signaling in Immune system, Signaling by GPCR, Signaling by Interleukins, Hematopoietic cell lineage, GPCR downstream signaling, T cell receptor signaling pathway |
| NFKBIE  | nuclear factor of kappa light polypeptide gene enhancer in B-cells inhibitor, epsilon | 2.949 | 1.07E-05 | experimentally determined, coexpression, textmining                                      | T cell receptor signaling pathway, TNFR1 signaling pathway, B cell receptor signaling pathway                                                                                                                                                                                                                                                                                                                                                                |
| FOSL1   | FOS-like antigen 1                                                                    | 2.891 | 3.82E-06 | experimentally determined, coexpression, protein homology, curated databases, textmining | AP-1 transcription factor network, Calcineurin-regulated NFAT-dependent transcription in lymphocytes, Osteoclast differentiation, Validated transcriptional targets of API family members Fra1 and Fra2, Calcium signaling in the CD4+ TCR pathway, Downstream signaling in naive CD8+ T cells,                                                                                                                                                              |
| PMAIP1  | phorbol-12-myristate-13-acetate-induced protein 1                                     | 2.875 | 5.28E-06 | experimentally determined, curated databases, textmining                                 | Direct p53 effectors                                                                                                                                                                                                                                                                                                                                                                                                                                         |
| EDN1    | endothelin 1                                                                          | 2.833 | 7.07E-05 | textmining                                                                               | AP-1 transcription factor network, GPCR signaling, GPCR ligand binding, Class A/1 (Rhodopsin-like receptors), Signaling by GPCR, Peptide ligand-binding receptors, GPCR downstream signaling                                                                                                                                                                                                                                                                 |

|          |                                                           |       |          |                                                               |                                                                                                                                                                                                                                                       |
|----------|-----------------------------------------------------------|-------|----------|---------------------------------------------------------------|-------------------------------------------------------------------------------------------------------------------------------------------------------------------------------------------------------------------------------------------------------|
| BCL2A1   | BCL2-related protein A1                                   | 2.825 | 5.55E-05 | experimentally determined, curated databases, textmining      | BCR signaling pathway                                                                                                                                                                                                                                 |
| CXCL3    | chemokine (C-X-C motif) ligand 3                          | 2.785 | 8.39E-05 | coexpression, curated databases, protein homology, textmining | Cytokine-cytokine receptor interaction, GPCR ligand binding, Class A/1 (Rhodopsin-like receptors), Chemokine receptors bind chemokines, Signaling by GPCR, Peptide ligand-binding receptors, GPCR downstream signaling, G alpha (i) signalling events |
| BBC3     | BCL2 binding component 3                                  | 2.710 | 3.30E-04 | experimentally determined, curated databases, textmining      | Direct p53 effectors                                                                                                                                                                                                                                  |
| SERPINB2 | serpin peptidase inhibitor, clade B (ovalbumin), member 2 | 2.582 | 2.35E-04 | curated databases, textmining                                 | None                                                                                                                                                                                                                                                  |
| PLAUR    | plasminogen activator, urokinase receptor                 | 2.572 | 2.95E-06 | coexpression, curated databases, textmining                   | Validated transcriptional targets of AP1 family members Fra1 and Fra2, amb2 Integrin signaling                                                                                                                                                        |
| ZFP36    | zinc finger protein 36, C3H type, homolog (mouse)         | 2.524 | 2.25E-05 | experimentally determined, coexpression, textmining           | None                                                                                                                                                                                                                                                  |
| PRDM1    | PR domain containing 1, with ZNF domain                   | 2.449 | 1.67E-05 | experimentally determined, textmining                         | Direct p53 effectors                                                                                                                                                                                                                                  |
| PIM1     | pim-1 oncogene                                            | 2.446 | 1.50E-04 | experimentally determined, curated databases, textmining      | Jak-STAT signaling pathway                                                                                                                                                                                                                            |
| PTX3     | pentraxin 3, long                                         | 3.721 | 6.06E-04 | coexpression, textmining                                      | None                                                                                                                                                                                                                                                  |
| IL1RL1   | interleukin 1 receptor-like 1                             | 3.396 | 5.31E-04 | textmining                                                    | None                                                                                                                                                                                                                                                  |
| IL24     | interleukin 24                                            | 2.485 | 1.51E-04 | textmining                                                    | Cytokine-cytokine receptor interaction, IL23-mediated signaling events                                                                                                                                                                                |
