# Supplementary material for: Group A Streptococcus M1T1 Intracellular Infection of Primary Tonsil Epithelial Cells Dampens Levels of Secreted IL-8 Through the Action of SpyCEP
Source: PubMed Central journal article supplement (PMC5966554; doi:10.3389/fcimb.2018.00160), 2018-05-17
Supplement: Table_2.pdf [file Table_2.pdf]

**Table S2. Metadata for transcriptome interaction network and pathway analysis of JRS4 intracellularly infected TEpi cells in comparison to mock TEpi cells.**

| Gene symbol | Full name                                                                             | Log2FC gene expression in comparison to Mock cells | Adjusted P-value | Protein-protein interaction data type from Stringdb.com                                   | Upregulated pathways from Innatedb.com                                                                                                                                                                                                                                                                                                                                                                                                                                                                                                                                                                 |
|-------------|---------------------------------------------------------------------------------------|----------------------------------------------------|------------------|-------------------------------------------------------------------------------------------|--------------------------------------------------------------------------------------------------------------------------------------------------------------------------------------------------------------------------------------------------------------------------------------------------------------------------------------------------------------------------------------------------------------------------------------------------------------------------------------------------------------------------------------------------------------------------------------------------------|
| ATF3        | activating transcription factor 3                                                     | 3.299                                              | 3.59E-03         | experimentally determined, co-expression, protein homology, curated databases, textmining | AP-1 transcription factor network, ATF-2 transcription factor network, Direct p53 effectors                                                                                                                                                                                                                                                                                                                                                                                                                                                                                                            |
| PTGS2       | prostaglandin-endoperoxide synthase 2 (prostaglandin G/H synthase and cyclooxygenase) | 3.207                                              | 6.56E-03         | curated databases, textmining                                                             | Calcineurin-regulated NFAT-dependent transcription in lymphocytes, Calcium signaling in the CD4+ TCR pathway, Leishmaniasis                                                                                                                                                                                                                                                                                                                                                                                                                                                                            |
| IL8         | interleukin 8                                                                         | 3.063                                              | 2.46E-03         | co-expression, protein homology, curated databases, textmining                            | AP-1 transcription factor network, Cytokine-cytokine receptor interaction, ATF-2 transcription factor network, Calcineurin-regulated NFAT-dependent transcription in lymphocytes, GPCR signaling, Chemokine receptors bind chemokines, GPCR ligand binding, Signaling by GPCR, Class A/1 (Rhodopsin-like receptors), NOD-like receptor signaling pathway, Validated transcriptional targets of AP1 family members Fra1 and Fra2, Peptide ligand-binding receptors, Amoebiasis, GPCR downstream signaling, G alpha (i) signalling events, Nfkb activation by nontypeable hemophilus influenzae, Malaria |
| IL36G       | interleukin 36, gamma                                                                 | 3.034                                              | 8.88E-05         | co-expression, textmining                                                                 | None                                                                                                                                                                                                                                                                                                                                                                                                                                                                                                                                                                                                   |
| CXCL2       | chemokine (C-X-C motif) ligand 2                                                      | 2.897                                              | 4.46E-03         | co-expression, protein homology, curated databases, textmining                            | Cytokine-cytokine receptor interaction, Chemokine receptors bind chemokines, GPCR ligand binding, Signaling by GPCR, Class A/1 (Rhodopsin-like receptors), NOD-like receptor signaling pathway, Peptide ligand-binding receptors, GPCR downstream signaling, G alpha (i) signalling events                                                                                                                                                                                                                                                                                                             |
| IL6         | interleukin 6 (interferon, beta 2)                                                    | 2.847                                              | 1.82E-02         | co-expression, curated databases, textmining                                              | AP-1 transcription factor network, Cytokine-cytokine receptor interaction, ATF-2 transcription factor network, GPCR signaling, IL23-mediated signaling events, Signaling by GPCR, NOD-like receptor signaling pathway, Validated transcriptional targets of AP1 family members Fra1 and Fra2, Amoebiasis, Jak-STAT signaling pathway, Hematopoietic cell lineage, Signal transduction through il1r, Graft-versus-host disease, Malaria, IL-10 anti-inflammatory signaling pathway                                                                                                                      |

|          |                                                           |       |          |                                                                         |                                                                                                                                                                                                                                                                                                                                                                                                                                                          |
|----------|-----------------------------------------------------------|-------|----------|-------------------------------------------------------------------------|----------------------------------------------------------------------------------------------------------------------------------------------------------------------------------------------------------------------------------------------------------------------------------------------------------------------------------------------------------------------------------------------------------------------------------------------------------|
| CLDN4    | claudin 4                                                 | 2.743 | 5.47E-04 | curated databases, protein homology, co-expression, textmining          | None                                                                                                                                                                                                                                                                                                                                                                                                                                                     |
| TNF      | tumor necrosis factor                                     | 2.606 | 3.08E-03 | co-expression, textmining                                               | Cytokine-cytokine receptor interaction, Calcineurin-regulated NFAT-dependent transcription in lymphocytes, GPCR signaling, IL23-mediated signaling events, NOD-like receptor signaling pathway, Amoebiasis, Hematopoietic cell lineage, Signal transduction through il1r, Graft-versus-host disease, Osteoclast differentiation, Nfkb activation by nontypeable hemophilus influenzae, Malaria, Il-10 anti-inflammatory signaling pathway, Leishmaniasis |
| SERPINB2 | serpin peptidase inhibitor, clade B (ovalbumin), member 2 | 2.446 | 2.86E-03 | curated databases, textmining                                           | Amoebiasis                                                                                                                                                                                                                                                                                                                                                                                                                                               |
| MMP3     | matrix metalloproteinase 3 (stromelysin 1, progelatinase) | 2.337 | 2.41E-02 | textmining                                                              | Signaling by GPCR                                                                                                                                                                                                                                                                                                                                                                                                                                        |
| CXCL3    | chemokine (C-X-C motif) ligand 3                          | 2.288 | 2.63E-03 | co-expression, protein homology, curated databases, textmining          | Cytokine-cytokine receptor interaction, Chemokine receptors bind chemokines, GPCR ligand binding, Signaling by GPCR, Class A/1 (Rhodopsin-like receptors), Peptide ligand-binding receptors, GPCR downstream signaling, G alpha (i) signalling events                                                                                                                                                                                                    |
| IL1RL1   | interleukin 1 receptor-like 1                             | 2.282 | 3.35E-02 | experimentally determined, textmining                                   | None                                                                                                                                                                                                                                                                                                                                                                                                                                                     |
| TNFAIP3  | tumor necrosis factor, alpha-induced protein 3            | 2.271 | 2.00E-03 | experimentally determined, co-expression, textmining                    | NOD-like receptor signaling pathway                                                                                                                                                                                                                                                                                                                                                                                                                      |
| DUSP1    | dual specificity phosphatase 1                            | 2.141 | 1.48E-03 | experimentally determined, co-expression, curated databases, textmining | AP-1 transcription factor network, ATF-2 transcription factor network, Direct p53 effectors, Nfkb activation by nontypeable hemophilus influenzae                                                                                                                                                                                                                                                                                                        |
| DLX2     | distal-less homeobox 2                                    | 2.136 | 2.63E-02 | textmining                                                              | None                                                                                                                                                                                                                                                                                                                                                                                                                                                     |
| IL24     | interleukin 24                                            | 2.006 | 4.50E-03 | co-expression, textmining                                               | Cytokine-cytokine receptor interaction, IL23-mediated signaling events, Jak-STAT signaling pathway                                                                                                                                                                                                                                                                                                                                                       |
| OCLN     | occludin                                                  | 2.004 | 2.86E-03 | experimentally determined, textmining                                   | None                                                                                                                                                                                                                                                                                                                                                                                                                                                     |
| PIM1     | pim-1 oncogene                                            | 1.931 | 5.21E-03 | experimentally determined, curated databases, textmining                | Jak-STAT signaling pathway                                                                                                                                                                                                                                                                                                                                                                                                                               |

|          |                                                   |       |          |                                                          |                                                                                                                                        |
|----------|---------------------------------------------------|-------|----------|----------------------------------------------------------|----------------------------------------------------------------------------------------------------------------------------------------|
| EGR2     | early growth response 2                           | 1.930 | 1.08E-02 | experimentally determined, textmining                    | Calcineurin-regulated NFAT-dependent transcription in lymphocytes                                                                      |
| FOSB     | FBJ murine osteosarcoma viral oncogene homolog B  | 1.929 | 2.03E-02 | experimentally determined, curated databases, textmining | AP-1 transcription factor network, Osteoclast differentiation                                                                          |
| PPP1R15A | protein phosphatase 1, regulatory subunit 15A     | 1.921 | 3.46E-04 | co-expression, curated databases, textmining             | None                                                                                                                                   |
| DUSP5    | dual specificity phosphatase 5                    | 1.909 | 2.62E-03 | experimentally determined, co-expression, textmining     | ATF-2 transcription factor network, Direct p53 effectors                                                                               |
| SOCS3    | suppressor of cytokine signaling 3                | 1.830 | 2.62E-03 | co-expression, curated databases, textmining             | ATF-2 transcription factor network, IL23-mediated signaling events, Jak-STAT signaling pathway, Osteoclast differentiation             |
| PRDM1    | PR domain containing 1, with ZNF domain           | 1.829 | 1.48E-03 | textmining                                               | Direct p53 effectors                                                                                                                   |
| HBEGF    | heparin-binding EGF-like growth factor            | 1.825 | 2.94E-03 | curated databases, textmining                            | GPCR signaling, Signaling by GPCR, ErbB receptor signaling network, ErbB signaling pathway                                             |
| PDE4B    | phosphodiesterase 4B, cAMP specific               | 1.810 | 7.73E-03 | experimentally determined, textmining                    | Signaling by GPCR, GPCR downstream signaling                                                                                           |
| PLAUR    | plasminogen activator, urokinase receptor         | 1.771 | 2.63E-04 | co-expression, curated databases, textmining             | Validated transcriptional targets of API family members Fra 1 and Fra2                                                                 |
| CD274    | CD274 molecule                                    | 1.768 | 4.26E-04 | co-expression, textmining                                | None                                                                                                                                   |
| ZFP36    | zinc finger protein 36, C3H type, homolog (mouse) | 1.745 | 2.00E-03 | co-expression, curated databases, textmining             | None                                                                                                                                   |
| HCAR2    | hydroxycarboxylic acid receptor 2                 | 1.727 | 1.48E-03 | curated databases, textmining                            | GPCR ligand binding, Signaling by GPCR, Class A/1 (Rhodopsin-like receptors), GPCR downstream signaling, G alpha (i) signalling events |
| PMAIP1   | phorbol-12-myristate-13-acetate-induced protein 1 | 1.695 | 1.48E-03 | textmining                                               | Direct p53 effectors                                                                                                                   |
| CLDN1    | Rho family GTPase 1                               | 1.691 | 1.10E-02 | textmining                                               | None                                                                                                                                   |
| RND1     | Rho family GTPase 1                               | 1.691 | 1.10E-02 | experimentally determined, textmining                    | None                                                                                                                                   |
| LMO7     | LIM domain 7                                      | 1.665 | 3.59E-03 | curated databases, textmining                            | None                                                                                                                                   |

|         |                                                                                |       |          |                                                                                           |                                                                                                                                                                                                                                                                                                                                        |
|---------|--------------------------------------------------------------------------------|-------|----------|-------------------------------------------------------------------------------------------|----------------------------------------------------------------------------------------------------------------------------------------------------------------------------------------------------------------------------------------------------------------------------------------------------------------------------------------|
| FOXA1   | forkhead box A1                                                                | 1.645 | 5.75E-03 | textmining                                                                                | Direct p53 effectors                                                                                                                                                                                                                                                                                                                   |
| RGS2    | regulator of G-protein signaling 2, 24kDa                                      | 1.637 | 3.25E-02 | curated databases, textmining                                                             | GPCR signaling, Signaling by GPCR, GPCR downstream signaling, G alpha (i) signalling events                                                                                                                                                                                                                                            |
| CCL20   | chemokine (C-C motif) ligand 20                                                | 1.589 | 2.82E-02 | co-expression, curated databases, textmining                                              | Cytokine-cytokine receptor interaction, Chemokine receptors bind chemokines, GPCR ligand binding, Signaling by GPCR, Class A/1 (Rhodopsin-like receptors), Peptide ligand-binding receptors, GPCR downstream signaling, G alpha (i) signalling events                                                                                  |
| CXCL1   | chemokine (C-X-C motif) ligand 1 (melanoma growth stimulating activity, alpha) | 1.524 | 1.09E-02 | co-expression, protein homology, curated databases, textmining                            | Cytokine-cytokine receptor interaction, IL23-mediated signaling events, Chemokine receptors bind chemokines, GPCR ligand binding, Signaling by GPCR, Class A/1 (Rhodopsin-like receptors), NOD-like receptor signaling pathway, Peptide ligand-binding receptors, Amoebiasis, GPCR downstream signaling, G alpha (i) signalling events |
| FOSL1   | FOS-like antigen 1                                                             | 1.517 | 1.48E-03 | experimentally determined, co-expression, protein homology, curated databases, textmining | AP-1 transcription factor network, Calcineurin-regulated NFAT-dependent transcription in lymphocytes, Validated transcriptional targets of AP1 family members Fra1 and Fra2, Calcium signaling in the CD4+ TCR pathway, Osteoclast differentiation                                                                                     |
| MMP10   | matrix metalloproteinase 10 (stromelysin 2)                                    | 1.514 | 4.00E-02 | experimentally determined, co-expression, protein homology, curated databases, textmining | None                                                                                                                                                                                                                                                                                                                                   |
| EGR3    | early growth response 3                                                        | 1.502 | 7.12E-03 | experimentally determined, co-expression, textmining                                      | Calcineurin-regulated NFAT-dependent transcription in lymphocytes                                                                                                                                                                                                                                                                      |
| VGLL3   | vestigial like 3 (Drosophila)                                                  | 1.489 | 1.48E-03 | co-expression, textmining                                                                 | None                                                                                                                                                                                                                                                                                                                                   |
| IL13RA2 | interleukin 13 receptor, alpha 2                                               | 1.480 | 1.48E-03 | curated databases, co-expression, textmining                                              | Jak-STAT signaling pathway                                                                                                                                                                                                                                                                                                             |
| GADD45B | growth arrest and DNA-damage-inducible, beta                                   | 1.454 | 1.43E-02 | co-expression, textmining                                                                 | None                                                                                                                                                                                                                                                                                                                                   |
| ADAMTS1 | ADAM metalloproteinase with thrombospondin type 1 motif, 1                     | 1.445 | 3.43E-02 | textmining                                                                                | None                                                                                                                                                                                                                                                                                                                                   |

|       |                                                                  |       |          |                                                                         |                                                                                                                                                                                                                                                                                                                                                                                       |
|-------|------------------------------------------------------------------|-------|----------|-------------------------------------------------------------------------|---------------------------------------------------------------------------------------------------------------------------------------------------------------------------------------------------------------------------------------------------------------------------------------------------------------------------------------------------------------------------------------|
| JUN   | jun proto-oncogene                                               | 1.440 | 3.59E-03 | experimentally determined, co-expression, curated databases, textmining | AP-1 transcription factor network, ATF-2 transcription factor network, Calcineurin-regulated NFAT-dependent transcription in lymphocytes, Validated transcriptional targets of API family members Fra1 and Fra2, Calcium signaling in the CD4+ TCR pathway, Signal transduction through il1r, Direct p53 effectors, Osteoclast differentiation, Leishmaniasis, ErbB signaling pathway |
| IL1B  | interleukin 1, beta                                              | 1.439 | 1.17E-02 | experimentally determined, co-expression, curated databases, textmining | Cytokine-cytokine receptor interaction, GPCR signaling, IL23-mediated signaling events, NOD-like receptor signaling pathway, Amoebiasis, Hematopoietic cell lineage, Signal transduction through il1r, Graft-versus-host disease, Osteoclast differentiation, Nfkb activation by nontypeable hemophilus influenzae, Malaria, Leishmaniasis                                            |
| GRHL1 | grainyhead-like 1 (Drosophila)                                   | 1.407 | 4.27E-02 | experimentally determined, protein homology, textmining                 | None                                                                                                                                                                                                                                                                                                                                                                                  |
| MMP1  | matrix metalloproteinase 1 (interstitial collagenase)            | 1.406 | 7.25E-03 | protein homology, curated databases, textmining                         | AP-1 transcription factor network, Validated transcriptional targets of API family members Fra 1 and Fra2                                                                                                                                                                                                                                                                             |
| MAFF  | v-maf musculoaponeurotic fibrosarcoma oncogene homolog F (avian) | 1.402 | 1.35E-02 | experimentally determined, co-expression, textmining                    | None                                                                                                                                                                                                                                                                                                                                                                                  |
| BMP2  | bone morphogenetic protein 2                                     | 1.368 | 2.94E-03 | curated databases, textmining                                           | Cytokine-cytokine receptor interaction, GPCR signaling                                                                                                                                                                                                                                                                                                                                |
| NRG1  | neuregulin 1                                                     | 1.352 | 4.50E-03 | co-expression, curated databases, textmining                            | GPCR signaling, ErbB receptor signaling network, ErbB signaling pathway                                                                                                                                                                                                                                                                                                               |
| EDN1  | endothelin 1                                                     | 1.351 | 3.17E-02 | co-expression, curated databases, textmining                            | AP-1 transcription factor network, GPCR signaling, GPCR ligand binding, Signaling by GPCR, Class A/1 (Rhodopsin-like receptors), Peptide ligand-binding receptors, GPCR downstream signaling                                                                                                                                                                                          |
| PELI1 | pellino E3 ubiquitin protein ligase 1                            | 1.314 | 5.75E-03 | curated databases, textmining                                           | None                                                                                                                                                                                                                                                                                                                                                                                  |
| ADRB2 | adrenoceptor beta 2, surface                                     | 1.309 | 5.81E-03 | experimentally determined, curated databases, textmining                | GPCR ligand binding, Signaling by GPCR, Class A/1 (Rhodopsin-like receptors), GPCR downstream signaling                                                                                                                                                                                                                                                                               |
| RND3  | Rho family GTPase 3                                              | 1.299 | 8.48E-03 | experimentally determined, co-expression, textmining                    | None                                                                                                                                                                                                                                                                                                                                                                                  |
| HAS2  | hyaluronan synthase 2                                            | 1.296 | 3.09E-02 | textmining                                                              | None                                                                                                                                                                                                                                                                                                                                                                                  |

|         |                                                           |       |          |                                                         |      |
|---------|-----------------------------------------------------------|-------|----------|---------------------------------------------------------|------|
| ADAMTS6 | ADAM metallopeptidase with thrombospondin type 1 motif, 6 | 1.265 | 9.78E-03 | textmining                                              | None |
| GRHL3   | grainyhead-like 3 (Drosophila)                            | 1.242 | 2.72E-03 | experimentally determined, protein homology, textmining | None |
