# Supplementary material for: Group A Streptococcus M1T1 Intracellular Infection of Primary Tonsil Epithelial Cells Dampens Levels of Secreted IL-8 Through the Action of SpyCEP
Source: PubMed Central journal article supplement (PMC5966554; doi:10.3389/fcimb.2018.00160), 2018-05-17
Supplement: Table_3.pdf [file Table_3.pdf]

**Table S3: Metadata for transcriptome interaction network and pathway analysis of 5448 intracellularly infected Tepi cells in comparison to JRS4 infected cells.**

| Gene symbol | Full name                                        | Log2FC gene expression in comparison to JRS4-infected cells | Adjusted P-value | Protein-protein interaction data type from Stringdb.com                | Upregulated pathways from Innatedb.com                                                                                                                                                                                                                           |
|-------------|--------------------------------------------------|-------------------------------------------------------------|------------------|------------------------------------------------------------------------|------------------------------------------------------------------------------------------------------------------------------------------------------------------------------------------------------------------------------------------------------------------|
| FOSB        | FBJ murine osteosarcoma viral oncogene homolog B | 3.484                                                       | 3.04E-04         | experimentally determined, textmining                                  | Osteoclast differentiation, AP-1 transcription factor network                                                                                                                                                                                                    |
| EGR4        | early growth response 4                          | 3.457                                                       | 1.02E-03         | experimentally determined, textmining                                  | Calcineurin-regulated NFAT-dependent transcription in lymphocytes, Downstream signaling in naïve CD8+ T cells                                                                                                                                                    |
| IRF1        | interferon regulatory factor 1                   | 3.390                                                       | 6.49E-04         | experimentally determined, coexpression, curated databases, textmining | Glucocorticoid receptor regulatory network, Cytokine Signaling in Immune system, IL6-mediated signaling events, Innate Immune System                                                                                                                             |
| TRAF1       | TNF receptor-associated factor 1                 | 3.253                                                       | 6.49E-04         | experimentally determined, coexpression, curated databases, textmining | CD40/CD40L signaling, Tnfr2 signaling pathway, HIV-1 Nef: Negative effector of Fas and TNF-alpha, RANKL, TNF receptor signaling pathway, TWEAK                                                                                                                   |
| BIRC3       | baculoviral IAP repeat containing 3              | 2.712                                                       | 6.49E-04         | experimentally determined, coexpression, curated databases, textmining | CD40/CD40L signaling, NOD-like receptor signaling pathway, HIV-1 Nef: Negative effector of Fas and TNF-alpha, Toll-Like Receptors Cascades, Activated TLR4 signalling, Toll Like Receptor 4 (TLR4) Cascade, TNF receptor signaling pathway, Innate Immune System |

|        |                                                                                       |       |          |                                                     |                                                                                                                                                                                                                                                                                                                                                                                                                                                                                                                                                                                                    |
|--------|---------------------------------------------------------------------------------------|-------|----------|-----------------------------------------------------|----------------------------------------------------------------------------------------------------------------------------------------------------------------------------------------------------------------------------------------------------------------------------------------------------------------------------------------------------------------------------------------------------------------------------------------------------------------------------------------------------------------------------------------------------------------------------------------------------|
| TNF    | tumor necrosis factor                                                                 | 2.622 | 6.54E-04 | coexpression, textmining                            | Calcineurin-regulated NFAT-dependent transcription in lymphocytes, Osteoclast differentiation, Cytokine-cytokine receptor interaction, MAPK signaling pathway, NOD-like receptor signaling pathway, JAK STAT pathway and regulation, HIV-1 Nef: Negative effector of Fas and TNF-alpha, Downstream signaling in naïve CD8+ T cells, T cell receptor signaling pathway, Hematopoietic cell lineage, Nfat and hypertrophy of the heart, Toll-like receptor signaling pathway, IL23-mediated signaling events, TNF receptor signaling pathway, TWEAK, Adipocytokine signaling pathway, GPCR signaling |
| PTX3   | pentraxin 3, long                                                                     | 2.578 | 3.73E-03 | textmining                                          | None                                                                                                                                                                                                                                                                                                                                                                                                                                                                                                                                                                                               |
| NFKBIE | nuclear factor of kappa light polypeptide gene enhancer in B-cells inhibitor, epsilon | 2.468 | 2.12E-04 | experimentally determined, coexpression, textmining | T cell receptor signaling pathway, Adipocytokine signaling pathway                                                                                                                                                                                                                                                                                                                                                                                                                                                                                                                                 |
| CD83   | CD83 molecule                                                                         | 2.433 | 1.09E-03 | coexpression, textmining                            | None                                                                                                                                                                                                                                                                                                                                                                                                                                                                                                                                                                                               |
| EGR2   | early growth response 2                                                               | 2.407 | 8.64E-04 | experimentally determined, coexpression, textmining | Calcineurin-regulated NFAT-dependent transcription in lymphocytes, IL4-mediated signaling events                                                                                                                                                                                                                                                                                                                                                                                                                                                                                                   |
| GDF15  | growth differentiation factor 15                                                      | 2.350 | 2.50E-03 | textmining                                          | Direct p53 effectors                                                                                                                                                                                                                                                                                                                                                                                                                                                                                                                                                                               |
| CCL20  | chemokine (C-C motif) ligand 20                                                       | 2.308 | 1.01E-03 | curated databases, coexpression, textmining         | Cytokine-cytokine receptor interaction, Class A/1 (Rhodopsin-like receptors), GPCR ligand binding, Peptide ligand-binding receptors, Chemokine receptors bind chemokines, Signaling by GPCR, GPCR downstream signaling                                                                                                                                                                                                                                                                                                                                                                             |
| LIF    | leukemia inhibitory factor                                                            | 2.261 | 2.55E-03 | curated databases, textmining                       | Cytokine-cytokine receptor interaction, JAK STAT pathway and regulation, Direct p53 effectors, Nfat and hypertrophy of the heart, GPCR signaling                                                                                                                                                                                                                                                                                                                                                                                                                                                   |
| MAFF   | v-maf musculoaponeurotic fibrosarcoma oncogene homolog F (avian)                      | 2.203 | 6.49E-04 | experimentally determined, textmining               | None                                                                                                                                                                                                                                                                                                                                                                                                                                                                                                                                                                                               |

|          |                                                      |       |          |                                                                            |                                                                                                                                                                                                                                                      |
|----------|------------------------------------------------------|-------|----------|----------------------------------------------------------------------------|------------------------------------------------------------------------------------------------------------------------------------------------------------------------------------------------------------------------------------------------------|
| NR4A3    | nuclear receptor subfamily 4, group A, member 3      | 2.202 | 4.58E-03 | experimentally determined, textmining                                      | None                                                                                                                                                                                                                                                 |
| BCL2A1   | BCL2-related protein A1                              | 2.139 | 8.09E-04 | experimentally determined, curated databases, textmining                   | None                                                                                                                                                                                                                                                 |
| PPP1R15A | protein phosphatase 1, regulatory subunit 15A        | 2.136 | 1.26E-04 | textmining                                                                 | None                                                                                                                                                                                                                                                 |
| TNFAIP2  | tumor necrosis factor, alpha-induced protein 2       | 2.114 | 6.85E-04 | textmining                                                                 | None                                                                                                                                                                                                                                                 |
| NR4A1    | nuclear receptor subfamily 4, group A, member 1      | 2.107 | 2.78E-03 | experimentally determined, coexpression, textmining                        | MAPK signaling pathway, Glucocorticoid receptor regulatory network, TCR, Innate Immune System                                                                                                                                                        |
| HBEGF    | heparin-binding EGF-like growth factor               | 2.044 | 6.71E-04 | curated databases, textmining                                              | Signaling by GPCR, Nfat and hypertrophy of the heart, GPCR signaling, Innate Immune System                                                                                                                                                           |
| CX3CL1   | chemokine (C-X3-C motif) ligand 1                    | 2.007 | 6.49E-04 | textmining                                                                 | Cytokine-cytokine receptor interaction, Class A/1 (Rhodopsin-like receptors), GPCR ligand binding, Peptide ligand-binding receptors, Chemokine receptors bind chemokines, Direct p53 effectors, Signaling by GPCR                                    |
| GEM      | GTP binding protein overexpressed in skeletal muscle | 1.951 | 8.52E-03 | experimentally determined, textmining                                      | None                                                                                                                                                                                                                                                 |
| EGR1     | early growth response 1                              | 1.894 | 3.28E-02 | experimentally determined, curated databases, protein homology, textmining | Calcineurin-regulated NFAT-dependent transcription in lymphocytes, AP-1 transcription factor network, Glucocorticoid receptor regulatory network, Downstream signaling in naïve CD8+ T cells, Oncostatin_M, TCR, Cytokine Signaling in Immune system |
| PTGER4   | prostaglandin E receptor 4 (subtype EP4)             | 1.891 | 7.20E-04 | textmining                                                                 | Class A/1 (Rhodopsin-like receptors), GPCR ligand binding, Signaling by GPCR, GPCR downstream signaling                                                                                                                                              |
| ICAM1    | intercellular adhesion molecule 1                    | 1.872 | 1.22E-03 | curated databases, coexpression, textmining                                | Glucocorticoid receptor regulatory network, Toll-Like Receptors Cascades, Activated TLR4 signalling, Toll Like Receptor 4 (TLR4) Cascade, Cytokine Signaling in Immune system, Toll-like receptor signaling pathway, Innate Immune System            |

|           |                                                                                    |        |          |                                                     |                                                                                                                                                                                                                                                             |
|-----------|------------------------------------------------------------------------------------|--------|----------|-----------------------------------------------------|-------------------------------------------------------------------------------------------------------------------------------------------------------------------------------------------------------------------------------------------------------------|
| BDKRB1    | bradykinin receptor B1                                                             | 1.866  | 6.73E-03 | curated databases                                   | Class A/1 (Rhodopsin-like receptors), GPCR ligand binding, Peptide ligand-binding receptors, Signaling by GPCR, GPCR downstream signaling                                                                                                                   |
| GADD45B   | growth arrest and DNA-damage-inducible, beta                                       | 1.825  | 1.03E-03 | textmining                                          | MAPK signaling pathway, IL12-mediated signaling events                                                                                                                                                                                                      |
| CXCL2     | chemokine (C-X-C motif) ligand 2                                                   | 1.820  | 3.96E-03 | coexpression, curated databases                     | Cytokine-cytokine receptor interaction, NOD-like receptor signaling pathway, Class A/1 (Rhodopsin-like receptors), GPCR ligand binding, Peptide ligand-binding receptors, Chemokine receptors bind chemokines, Signaling by GPCR, GPCR downstream signaling |
| EGR3      | early growth response 3                                                            | 1.780  | 6.68E-04 | experimentally determined, textmining               | Calcineurin-regulated NFAT-dependent transcription in lymphocytes                                                                                                                                                                                           |
| TNFAIP3   | tumor necrosis factor, alpha-induced protein 3                                     | 1.699  | 1.70E-03 | experimentally determined, coexpression, textmining | CD40/CD40L signaling, NOD-like receptor signaling pathway, Tnfr2 signaling pathway, TNF receptor signaling pathway, Innate Immune System                                                                                                                    |
| NFKBIZ    | nuclear factor of kappa light polypeptide gene enhancer in B-cells inhibitor, zeta | 1.647  | 2.48E-03 | experimentally determined, textmining               | None                                                                                                                                                                                                                                                        |
| CORO6     | coronin 6                                                                          | 1.621  | 1.22E-03 | experimentally determined, coexpression, textmining | None                                                                                                                                                                                                                                                        |
| LRIG3     | leucine-rich repeats and immunoglobulin-like domains 3                             | -1.608 | 1.02E-03 | experimentally determined, textmining               | None                                                                                                                                                                                                                                                        |
| ACTL10    | actin-like 10                                                                      | -1.765 | 2.91E-03 | experimentally determined, coexpression, textmining | None                                                                                                                                                                                                                                                        |
| HIST1H2BF | histone cluster 1, H2bf                                                            | -1.959 | 4.94E-02 | experimentally determined, coexpression, textmining | None                                                                                                                                                                                                                                                        |
